# Supplementary material for: Viromics unveils extraordinary genetic diversity of the family Closteroviridae in wild citrus
Source: PLoS Pathog. 2021 Jul 12;17(7):e1009751. doi: 10.1371/journal.ppat.1009751 (PMC8297929; doi:10.1371/journal.ppat.1009751)
Supplement: S1 Table — The information concerning library construction and corresponding geographic locations, collection dates, and species of samples for each sequencing library. (XLSX) [file ppat.1009751.s008.xlsx]

## Sheet: Sheet1
Locations	Samples	Genus/species	RNA library	Years
location 1	YN4-1	genus Citrus	YN4-1	2018
	YN10-1, YN10-2, YN10-3	Citrus.limonia Osbeck	YS42	2018
		C.medica
location 2	YN2-1, YN2-4,	C.maxima	YS11	2018
	YN2-2, YN2-3	C.limon
	YNL7-2	C.limon	YN7-2	2019
	YNL8-2	genus Citrus	YN8-2	2019
	YNL8-3	genus Citrus	YN8-3	2019
	YNL8-7	genus Citrus	YN8-7	2019
	YNL6-2, YNL6-3, YNL7-1, YNL7-4, YNL7-6, YNL8-1,	genus Citrus	YNM2	2019
	YNL8-6, YNL8-8, YNL8-9
location 3	YN1-2	C.reticulata Blanco	YN1-2	2018
	YN1-3	C.reticulata Blanco	YN1-3	2018
	YN1-4	C.sinensis	YN1-4	2018
	YN1-6	C.reticulata Blanco	YN1-6	2018
	YN1-7	C.reticulata Blanco	YN1-7	2018
	YN1-8, YN3-1,	C.reticulata Blanco	YS31	2018
	YN3-2, YN3-3
location 4	YN12-1	genus Citrus	YN12-1	2018
	YN12-3	C.medica	YN12-3	2018
